# Supplementary material
Source: PubMed Central journal article supplement (PMC4402960)
Supplement: 79.1.117_zmr001152384so1.pdf [file 79.1.117_zmr001152384so1.pdf]

## Supplementary Materials

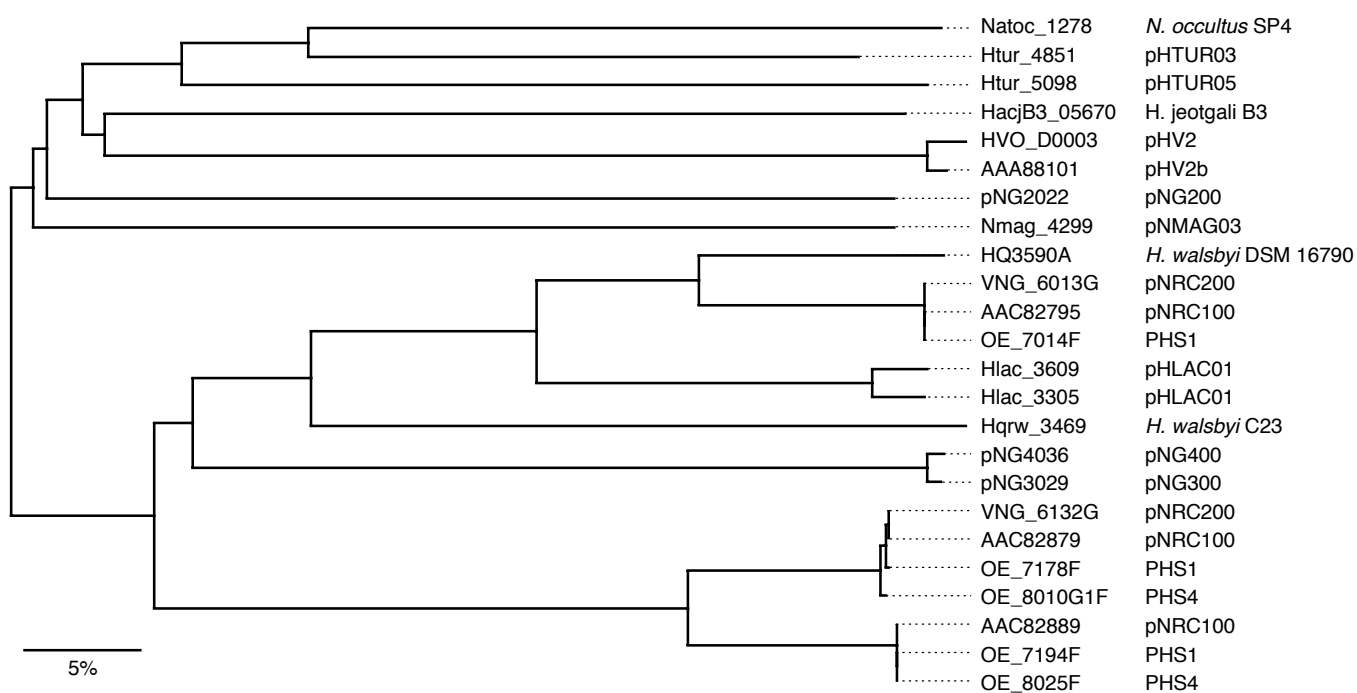

**Fig. S1 A phylogenetic tree of RepH homologs of haloarchaeal plasmids.**

The dendrogram is based on the similarities of protein sequences of RepH identified in the GenBank databases. The ruler in the bottom indicates the branch length corresponding to 5 % dissimilarity, while plasmids which do share sequences are separated by smaller branch lengths. Each RepH is indicated by its gene annotation and name of the plasmid.

## II. Supplementary tables

**Table S1. Archaeal viruses<sup>1</sup>**

| Viron morphology | Taxonomy              |                          | Virus                                | Species name                                      | Host              | Genome   |                   |          | References |
|------------------|-----------------------|--------------------------|--------------------------------------|---------------------------------------------------|-------------------|----------|-------------------|----------|------------|
|                  | Family                | Genus                    |                                      |                                                   |                   | Size(kb) | Type <sup>2</sup> | int      |            |
|                  |                       |                          |                                      |                                                   |                   |          |                   |          |            |
| Spindle          | <i>Fuselloviridae</i> | <i>Alphafusellovirus</i> | SSV1                                 | <i>Sulfolobus</i> spindle-shaped virus 1          | <i>Sulfolobus</i> | 15.4     | ds, C             | +        | (1, 2)     |
|                  |                       |                          | SSV2                                 | <i>Sulfolobus</i> spindle-shaped virus 2          | <i>Sulfolobus</i> | 14.7     | ds, C             | +        | (3)        |
|                  |                       |                          | SSV4                                 | <i>Sulfolobus</i> spindle-shaped virus 4          | <i>Sulfolobus</i> | 15.1     | ds, C             | +        | (4)        |
|                  |                       |                          | SSV5                                 | <i>Sulfolobus</i> spindle-shaped virus 5          | <i>Sulfolobus</i> | 15.3     | ds, C             | +        | (4)        |
|                  |                       |                          | SSV7                                 | <i>Sulfolobus</i> spindle-shaped virus 7          | <i>Sulfolobus</i> | 17.6     | ds, C             | +        | (4)        |
|                  |                       |                          | SSV8                                 | <i>Sulfolobus</i> spindle-shaped virus 8          | <i>Sulfolobus</i> | 16.4     | ds, C             | +        | (5)        |
|                  |                       |                          | SSV9                                 | <i>Sulfolobus</i> spindle-shaped virus 9          | <i>Sulfolobus</i> | 17.4     | ds, C             | +        | (5)        |
|                  |                       |                          | SSV6                                 | <i>Sulfolobus</i> spindle-shaped virus 6          | <i>Sulfolobus</i> | 15.6     | ds, C             | +        | (4)        |
|                  |                       |                          | ASV1                                 | <i>Acidianus</i> spindle-shaped virus 1           | <i>Acidianus</i>  | 24.1     | ds, C             | +        | (4)        |
|                  | <i>Bicaudaviridae</i> | <i>Bicaudavirus</i>      | ATV                                  | <i>Acidianus</i> two-tailed virus                 | <i>Acidianus</i>  | 62.7     | ds, C             | +        | (6, 7)     |
|                  | Unclassified          | <i>Salterprovirus</i>    | His1                                 | His virus 1                                       | <i>Haloarcula</i> | 14.4     | ds, L             | -        | (8, 9)     |
|                  |                       |                          | His2                                 | His virus 2                                       | <i>Haloarcula</i> | 16.1     | ds, L             | -        | (8, 9)     |
|                  | Unclassified          | Unclassified             | STSV1                                | <i>Sulfolobus tengchongensis</i> spindle-shaped 1 | <i>Sulfolobus</i> | 75.3     | ds, C             | +        | (10)       |
|                  |                       |                          | STSV2                                | <i>Sulfolobus tengchongensis</i> spindle-shaped 2 | <i>Sulfolobus</i> | 76.1     | ds, C             | +        | (11)       |
| PAV1             |                       |                          | <i>Pyrococcus abyssi</i> virus 1     | <i>Pyrococcus</i>                                 | 18.1              | ds, C    | -                 | (12, 13) |            |
| TPV1             |                       |                          | <i>Thermococcus prieurii</i> virus 1 | <i>Thermococcus</i>                               | 21.5              | ds, C    | +                 | (14)     |            |

|                     |                                         |                         |                                      |                                                 |                                                       |                      |       |       |          |      |
|---------------------|-----------------------------------------|-------------------------|--------------------------------------|-------------------------------------------------|-------------------------------------------------------|----------------------|-------|-------|----------|------|
|                     | Unclassified                            |                         | ACV                                  | <i>Aeropyrum</i> coil-shaped virus              | <i>Aeropyrum</i>                                      | 24.9                 | ss, D | -     | (18)     |      |
| Droplet             | <i>Guttaviridae</i>                     |                         | <i>Alphaguttavirus</i>               | SNDV                                            | <i>Sulfolobus neozealandicus</i> droplet-shaped virus | <i>Sulfolobus</i>    | ~20   | ds, C | -        | (19) |
|                     |                                         |                         | <i>Betaguttavirus</i>                | APOV1                                           | <i>Aeropyrum pernix</i> ovoid virus 1                 | <i>Aeropyrum</i>     | 13.8  | ds, C | +        | (15) |
| <sup>3</sup> Linear | <i>Ligamenvirales</i>                   | <i>Lipothrixviridae</i> | <i>Alphalipothrixvirus</i>           | TTV1                                            | <i>Thermoproteus tenax</i> virus 1                    | <i>Thermoproteus</i> | 15.9  | ds, L | -        | (20) |
|                     |                                         |                         | <i>Betalipothrixvirus</i>            | SIFV                                            | <i>Sulfolobus islandicus</i> filamentous virus        | <i>Sulfolobus</i>    | 40.8  | ds, L | -        | (21) |
|                     |                                         |                         |                                      | AFV3                                            | <i>Acidianus</i> filamentous virus 3                  | <i>Acidianus</i>     | 40.4  | ds, L | -        | (22) |
|                     |                                         |                         |                                      | AFV6                                            | <i>Acidianus</i> filamentous virus 6                  | <i>Acidianus</i>     | 39.5  | ds, L | -        | (22) |
|                     |                                         |                         |                                      | AFV7                                            | <i>Acidianus</i> filamentous virus 7                  | <i>Acidianus</i>     | 36.8  | ds, L | -        | (22) |
|                     |                                         |                         |                                      | AFV8                                            | <i>Acidianus</i> filamentous virus 8                  | <i>Acidianus</i>     | 38.1  | ds, L | -        | (22) |
|                     |                                         |                         | AFV9                                 | <i>Acidianus</i> filamentous virus 9            | <i>Acidianus</i>                                      | 41.1                 | ds, L | -     | (23)     |      |
|                     |                                         |                         | <i>Gammalipthrixvirus</i>            | AFV1                                            | <i>Acidianus</i> filamentous virus 1                  | <i>Acidianus</i>     | 20.9  | ds, L | -        | (24) |
|                     | <i>Deltalipothrixvirus</i>              | AFV2                    | <i>Acidianus</i> filamentous virus 2 | <i>Acidianus</i>                                | 31.7                                                  | ds, L                | -     | (25)  |          |      |
|                     | <i>Rudiviridae</i>                      | <i>Rudivirus</i>        | SIRV2                                | <i>Sulfolobus islandicus</i> rod-shaped virus 2 | <i>Sulfolobus</i>                                     | 35.4                 | ds, L | -     | (26, 27) |      |
|                     |                                         |                         | SIRV1                                | <i>Sulfolobus islandicus</i> rod-shaped virus 1 | <i>Sulfolobus</i>                                     | 32.3                 | ds, L | -     | (26, 27) |      |
| ARV1                |                                         |                         | <i>Acidianus</i> rod-shaped virus 1  | <i>Acidianus</i>                                | 24.6                                                  | ds, L                | -     | (28)  |          |      |
| Unclassified        |                                         | SRV                     | <i>Stygiolobus</i> rod-shaped virus  | <i>Stygiolobus</i>                              | 28.1                                                  | ds, L                | -     | (29)  |          |      |
| Spherical           | <i>Globulaviridae</i>                   | <i>Globulovirus</i>     | PSV                                  | <i>Pyrobaculum</i> spherical virus              | <i>Pyrobaculum</i>                                    | 28.3                 | ds, L | -     | (30)     |      |
|                     |                                         |                         | TTSV1                                | <i>Thermoproteus tenax</i> spherical virus 1    | <i>Thermoproteus</i>                                  | 21.6                 | ds, L | -     | (31)     |      |
|                     | Unclassified                            | Unclassified            | STIV                                 | <i>Sulfolobus</i> turreted icosahedral virus    | <i>Sulfolobus</i>                                     | 16.6                 | ds, C | -     | (32)     |      |
|                     |                                         |                         | STIV2                                | <i>Sulfolobus</i> turreted icosahedral virus 2  | <i>Sulfolobus</i>                                     | 17.6                 | ds, C | -     | (11)     |      |
|                     |                                         |                         | SH1                                  | Spherical halovirus 1                           | <i>Haloarcula/Haloferax/Halorubrum</i>                | 30.9                 | ds, L | -     | (33)     |      |
|                     |                                         |                         | HHIV-2                               | <i>Haloarcula hispanica</i> icosahedral virus 2 | <i>Haloarcula</i>                                     | 30.6                 | ds, L | -     | (34)     |      |
| PH1                 | Pink Lake <i>Har. hiapanica</i> virus 1 | <i>Haloarcula</i>       | 28.1                                 | ds, L                                           | -                                                     | (35)                 |       |       |          |      |
| Pleomorphic         | Unclassified                            | Unclassified            | HHPV-1                               | <i>Haloarcula hispanica</i> pleomorphic virus 1 | <i>Haloarcula</i>                                     | 8.1                  | ds, C | -     | (36)     |      |
|                     |                                         |                         | HHPV-2                               | <i>Haloarcula hispanica</i> pleomorphic         | <i>Haloarcula</i>                                     | 8.2                  | ss, C | -     | (37)     |      |

|           |                     |                         |         |                                             |                                  |      |       |   |              |
|-----------|---------------------|-------------------------|---------|---------------------------------------------|----------------------------------|------|-------|---|--------------|
|           |                     |                         |         | virus 2                                     |                                  |      |       |   |              |
|           |                     |                         | HRPV-1  | <i>Halorubrum</i> pleomorphic virus 1       | <i>Halorubrum</i> , <sup>3</sup> | 7.0  | ss, C | - | (38)         |
|           |                     |                         | HGPV-1  | <i>Halogeometricum</i> pleomorphic virus 1  | <i>Halogeometricum</i>           | 9.7  | ds, C | - | (39, 40)     |
|           |                     |                         | HRPV-2  | <i>Halorubrum</i> pleomorphic virus 2       | <i>Halorubrum</i>                | 10.7 | ss, C | - | (39, 40)     |
|           |                     |                         | HRPV-3  | <i>Halorubrum</i> pleomorphic virus 3       | <i>Halorubrum</i>                | 8.8  | ds, C | - | (39, 40)     |
|           |                     |                         | HRPV-6  | <i>Halorubrum</i> pleomorphic virus 6       | <i>Halorubrum</i>                | 8.5  | ss, C | - | (39, 40)     |
| Head-tail | <i>Myoviridae</i>   | <i>Phihlikevirus</i>    | phiH    | <i>Halobacterium</i> phage phiH             | <i>Halobacterium</i>             | ~59  | ds, L | + | (41)         |
|           |                     | Unclassified            | phiCh1  | phiCh1                                      | <i>Natrialba</i>                 | 58.5 | ds, L | - | (42)         |
|           | <i>Siphoviridae</i> | <i>Psimunalikevirus</i> | psiM1   | <i>Methanobacterium</i> phage psiM1         | <i>Methanobacterium</i>          | 30.4 | ds, L | ? | (43)         |
|           |                     | Unclassified            | psiM2   | <i>Methanobacterium</i> phage psiM2         | <i>Methanobacterium</i>          | 26.1 | ds, L | + | (44)         |
|           |                     |                         | psiM100 | <i>Methanothermobacter</i> prophage psiM100 | <i>Methanothermobacter</i>       | 28.8 | ds, L | + | (45)         |
|           |                     |                         | BJ1     | BJ1                                         | <i>Halorubrum</i>                | 42.3 | ds, C | + | (46, 47)     |
|           | Unclassified        | Unclassified            | SNJ1    | SNJ1                                        | <i>Natrinema</i>                 | 16.3 | ds, C | - | (39, 48, 49) |
|           |                     |                         | HF1     | HF1                                         | <i>Halobrum</i>                  | 75.9 | L     | + | (41, 50, 51) |
|           |                     |                         | HF2     | HF2                                         | <i>Halobacterium</i>             | 77.7 | L     | + | (52, 53)     |

<sup>1</sup> This table is prepared in accordance with the 2012 version of the ICTV catalogue.

<sup>2</sup> The genome type is indicated as follows: ds, double-stranded DNA genome; ss, single-stranded DNA genome; L, linear genome; C, circular genome.

<sup>3</sup> Linear viruses are assigned to the only order of archaeal viruses Ligamenvirales.

**Table S2. Archaeal plasmids**

| Order/Family  | Type                 | Classification | Name             | Size (kb)  | Host                               | Main features                                                                                              | Refs                 |                                                              |
|---------------|----------------------|----------------|------------------|------------|------------------------------------|------------------------------------------------------------------------------------------------------------|----------------------|--------------------------------------------------------------|
| Sulfolobaceae | Cryptic plasmids     | pRN family     | pDL10            | 7.6        | <i>Acidianus ambivalens</i>        | Putative Pri/Pol domain replicase of pRN family                                                            | (54)                 |                                                              |
|               |                      |                | pRN1             | 5.3        | <i>Sulfolobus islandicus</i>       | Pri/Pol domain replicase of pRN family, shuttle vector pC etc.                                             | (55-57)              |                                                              |
|               |                      |                | pRN2             | 6.9        | <i>S. islandicus</i>               | Putative Pri/Pol domain replicase of pRN family, shuttle vector pHZ2, pZC1, expression plasmid pSeSD, pEXA | (56, 58-61)          |                                                              |
|               |                      |                | pHEN7            | 7.8        | <i>S. islandicus</i>               | Putative Pri/Pol domain replicase of pRN family                                                            | (62)                 |                                                              |
|               |                      | Unclassified   | pIT3             | 4.9        | <i>Sulfolobus solfataricus</i>     | Putative Pri/Pol domain replicase                                                                          | (63)                 |                                                              |
|               |                      |                | pXZ1             | 6.9        | <i>S. islandicus</i> strain ARN3/6 | Putative Pri/Pol domain replicase                                                                          | (64)                 |                                                              |
|               |                      |                | pTIK4            | 13.6       | <i>Sulfolobus neozealandicus</i>   | Putative Pri/Pol domain replicase                                                                          | (65)                 |                                                              |
|               |                      |                | pTAU4            | 7.2        | <i>S. neozealandicus</i>           | MCM as putative replicase                                                                                  | (65)                 |                                                              |
|               |                      |                | pORA1            | 9.7        | <i>S. neozealandicus</i>           | Putative Pri/Pol domain replicase                                                                          | (65)                 |                                                              |
|               |                      |                | Virus satellites | pRN family | pSSVx                              | 5.7                                                                                                        | <i>S. islandicus</i> | Plasmid-virus hybrid, Pri/Pol domain replicase of pRN family |
|               | Unclassified         | pSSVi          |                  | 5.7        | <i>S. solfataricus</i>             | Plasmid-virus hybrid, SF III Helicase                                                                      | (67)                 |                                                              |
|               | Conjugative plasmids |                |                  | pAH1       | 28.6                               | <i>Acidianus hospitalis</i> strain W1                                                                      | Conjugative          | (68)                                                         |
|               |                      |                |                  | pARN3      | 26.2                               | <i>S. islandicus</i>                                                                                       | Conjugative          | (69)                                                         |
|               |                      |                |                  | pARN4      | 26.5                               | <i>S. islandicus</i>                                                                                       | Conjugative          | (69)                                                         |
|               |                      |                |                  | pHVE14     | 35.4                               | <i>S. islandicus</i>                                                                                       | Conjugative          | (69)                                                         |
|               |                      |                |                  | pING1      | 24.5                               | <i>S. islandicus</i>                                                                                       | Conjugative          | (70)                                                         |
| pKEF9         |                      |                |                  | 28.9       | <i>S. islandicus</i>               | Conjugative CRISPR                                                                                         | (69)                 |                                                              |
| pSOG1         |                      |                |                  | 29         | <i>S. islandicus</i>               | Conjugative                                                                                                | (71)                 |                                                              |
| pSOG2         |                      |                |                  | 25.9       | <i>S. islandicus</i>               | Conjugative                                                                                                | (71)                 |                                                              |

|                  |                    |            |         |      |                                                |                                                                                       |                              |
|------------------|--------------------|------------|---------|------|------------------------------------------------|---------------------------------------------------------------------------------------|------------------------------|
|                  |                    |            | pLD8501 | 26.6 | <i>S. islandicus</i> L.D.8.5                   | Conjugative, identified from genome sequencing                                        | Reno et al., unpublished     |
|                  |                    |            | pYN01   | 42.2 | <i>S. islandicus</i> Y.N.15.51                 | Conjugative, identified from genome sequencing                                        | (72)                         |
|                  |                    |            | pNOB8   | 41.2 | <i>Sulfolobus</i> sp. NOB8H2 conjugative       | Conjugative, carrying a CRISPR array, ParA and ParB implicated in plasmid segregation | (73, 74)                     |
|                  |                    |            | pTC     | 20.4 | <i>Sulfolobus tengchongensis</i>               | Conjugative plasmid, lacking an integrase                                             | Xiang and Huang, unpublished |
| Host unknown     | Enrichment culture |            | pHA1    | 33.8 | Archaeon enrichment culture clone 1            | Conjugative plasmid identified from metagenomics                                      | (75)                         |
| Thermoproteaceae |                    |            | pTPEN01 | 31.5 | <i>Thermofilum pendens</i> Hrk 5               |                                                                                       | Copeland et al., unpublished |
| Haloarchaeaceae  | Small plasmids     | θ family   | pZMX101 | 3.9  | <i>Halorubrum saccharovororum</i>              | Shuttle vector pZMX108, RepA, minimal replicon                                        | (76)                         |
|                  |                    |            | pSCM201 | 3.4  | <i>Haloarcula</i> sp. AS7094                   | Unidirectional theta mechanism, minimal replicon defined, expression vector pPbop     | (77, 78)                     |
|                  |                    | RCR family | pZMX201 | 1.6  | <i>Natrinema</i> sp. CX2021                    | RCR mechanism, RepZ                                                                   | (79)                         |
|                  |                    |            | pNB101  | 2.5  | <i>Natronobacterium</i> sp. AS-7091            | RCR mechanism, RepN                                                                   | (80)                         |
|                  |                    |            | pSN     | 2.2  | <i>Haloterrigena thermotolerans</i> strain H13 |                                                                                       | You and Lai, unpublished     |
|                  |                    |            | pEHSP   | 1.7  | <i>Halobacterium halobium</i>                  | Putative RCR replicase,                                                               | (81)                         |
|                  |                    |            | pHGN1   | 1.7  | <i>Halobacterium</i> sp. GN101                 | Putative RCR replicase, similar to pHSB                                               | (82)                         |
|                  |                    |            | pGRB1   | 1.8  | <i>Halobacterium</i> GRB                       | Putative RCR replicase, Rep                                                           | (83-85)                      |
|                  |                    |            | pHSB1   | 1.7  | <i>Halobacterium</i> strain SB3/strain GRB     | Putative RCR replicase, shuttle vector                                                | (81, 86)                     |
|                  |                    |            | pHK2    | 10.8 | <i>Haloferax</i> Aa2.2/ <i>Haloarcula</i>      | Putative RCR replicase, shuttle vector pMLH3, pMDS20                                  | (87-89)                      |

|                     |                  |                 |                               |                         |                                                   |                                                        |                          |
|---------------------|------------------|-----------------|-------------------------------|-------------------------|---------------------------------------------------|--------------------------------------------------------|--------------------------|
|                     |                  | Unclassified    | pHV2b                         | 6.3                     | <i>hispanica</i><br><i>Haloferax volcanii</i> DS2 | Replicase unknown, Shuttle vector pTA963               | (90, 91)                 |
|                     |                  |                 | pHV2                          | 6.3                     | <i>H. volcanii</i> DS2                            | Replicase unknown, shuttle vectors                     | (90, 92)                 |
|                     |                  |                 | PL6A                          | 6.1                     | <i>Haloquadratum walsbyi</i> C23                  | Genome sequencing                                      | (93)                     |
|                     |                  |                 | PL6B                          | 6                       | <i>H.walsbyi</i> C23                              | Genome sequencing                                      | (93)                     |
|                     |                  |                 | pHJ6                          | 6.9                     | <i>Halalkalicoccus jeotgali</i> B3                | Genome sequencing                                      | (94)                     |
| Thermococcaceae     | Cryptic plasmids | pGT5 RCR family | pGT5                          | 3.4                     | <i>Pyrococcus abyssi</i> GE5                      | RCR mechanism, Rep75, Shuttle vector pAG1 series; pYS2 | (95-97)                  |
|                     |                  |                 | pTN1                          | 3.6                     | <i>Thermococcus nautilus</i> 30-1                 | RCR mechanism, Rep74, Shuttle vector pLC64             | (98, 99)                 |
|                     |                  |                 | pTP1                          | 3.1                     | <i>Thermococcus prieurii</i>                      | RCR mechanism, homologous to pGT5, RepTP1              | (100)                    |
|                     |                  |                 | pTP2                          | 2                       | <i>Thermococcus prieurii</i>                      | Putative RCR plasmid                                   | (100)                    |
|                     |                  | Unclassified    | pAMT11                        | 20.5                    | <i>Thermococcus</i> sp. AMT11                     | From black smokers of the East Pacific Rise,           | (101)                    |
|                     |                  |                 | pRT1                          | 3.3                     | <i>Pyrococcus</i> sp. JT1                         |                                                        | (102)                    |
|                     |                  | pT26-2 family   | pT26-2                        | 21.5                    | <i>Thermococcus</i> sp. 26/2                      | Integrative,                                           | (103)                    |
|                     |                  | pTN2 family     | pTN2                          | 13                      | <i>Thermococcus nautilus</i> strain 30/1          | Encoding a novel Pri/Pol replicase                     | (103)                    |
|                     |                  |                 | pCIR10                        | 13.3                    | <i>Thermococcus</i> sp. CIR10                     | pTN2-like Pri/Pol replicase                            | (104)                    |
|                     |                  |                 | pP12-1                        | 12.2                    | <i>Pyrococcus</i> sp. 12/1                        | pTN2-like Pri/Pol replicase                            | (103)                    |
|                     |                  |                 | pIR48                         | 12.9                    | <i>Thermococcus</i> sp. IR48                      | pTN2-like Pri/Pol replicase                            | (104)                    |
|                     |                  | pEXT9a family   | pAMT7                         | 8.5                     | <i>Thermococcus</i> sp. AMT7                      | Novel type of replicase                                | (104)                    |
|                     |                  |                 | pEXT9a                        | 10.5                    | <i>Thermococcus</i> sp. EXT9                      | Novel type of replicase                                | (104)                    |
| pIRI33              | 11               |                 | <i>Thermococcus</i> sp. IRI33 | Novel type of replicase | (104)                                             |                                                        |                          |
| Methanogen plasmids | Methanococcaeae  | pT26-2 family   | pMEFER01                      | 22.2                    | <i>Methanocaldococcus fervens</i> AG86            | Genome sequencing, Acc. No. CP001697                   | Lucas et al. unpublished |

|  |                     |               |          |       |                                                      |                                                  |                             |
|--|---------------------|---------------|----------|-------|------------------------------------------------------|--------------------------------------------------|-----------------------------|
|  |                     |               | pURB500  | 8.3   | <i>Methanococcus maripaludis</i>                     | Shuttle vector pDLT44                            | (105)                       |
|  |                     |               | pMMC501  | 8.3   | <i>Methanococcus maripaludis</i> C5                  | Genome sequencing, Acc. No. CP000610             | Copeland et al. unpublished |
|  |                     | pEXT9a family | pMETVU01 | 10.7  | <i>Methanocaldococcus vulcanius</i> M7               | Genome sequencing, Acc. No. CP001788             | Lucas et al. unpublished    |
|  |                     | Unclassified  | pMETVU02 | 4.7   | <i>Methanocaldococcus vulcanius</i> M7               | Genome sequencing, Acc. No. CP001789             | Lucas et al. unpublished    |
|  |                     |               | pMJ-ECE2 | 58.4  | <i>Methanocaldococcus jannaschii</i> DSM 2661        | Genome sequencing, Acc. No. L77118               | (106)                       |
|  |                     |               | pMJ-ECE1 | 16.5  | <i>Methanocaldococcus jannaschii</i> DSM 2661        | Genome sequencing, Acc. No. L77119               | (106)                       |
|  |                     |               | pFS01    | 12.2  | <i>Methanocaldococcus</i> sp. FS406-22               | Genome sequencing, Acc. No. CP001902             | Lucas et al. unpublished    |
|  | Methanobacteriaceae | Unclassified  | pMETEV01 | 163.9 | <i>Methanohalobium evestigatum</i> Z-7303            | Genome sequencing, Acc. No. CP002070             | Lucas et al. unpublished    |
|  |                     |               | pMTBMA4  | 4.4   | <i>Methanothermobacter marburgensis</i> str. Marburg | Genome sequencing, Acc. No. CP001711             | (107)                       |
|  |                     |               | pMP1     | ~7    | Methanogen PL-12/M                                   | Cryptic                                          | (108)                       |
|  |                     |               | pME2001  | 4.4   | <i>Methanothermobacter autotrophicum</i> Marburg     | Cryptic                                          | (109-111)                   |
|  |                     |               | pME2200  | 6.2   | <i>Methanothermobacter autotrophicum</i> strain ZH3  | Cryptic                                          | (111)                       |
|  |                     |               | pFV1     | 13.5  | <i>M. thermoformicum</i> THF                         | Orc1/Cdc6 as the putative replicase, Type II R-M | (112, 113)                  |
|  |                     |               | pFZ1     | 11    | <i>M. thermoformicum</i> Z245                        | Orc1/Cdc6 as the putative replicase, Type II R-M | (112)                       |
|  | Methanosarcinaceae  | Unclassified  | pC2A     | 5.4   | <i>Methanosarcina acetivorans</i>                    | Integrative, shuttle vector pWM307 etc           | (114, 115)                  |
|  |                     |               | p1       | 36.3  | <i>Methanosarcina</i>                                | Genome sequencing, Acc. No.                      | (116)                       |



|                |          |     |                                            |                                                                        |          |  |
|----------------|----------|-----|--------------------------------------------|------------------------------------------------------------------------|----------|--|
|                |          |     |                                            | <i>barkeri</i> str. Fusaro                                             | CP000098 |  |
| Other plasmids | pPO1     | 7.6 | <i>Picrophilus oshimae</i>                 | Orc1/Cdc6 as the putative replicase,<br>encoding a putative R-M system | (117)    |  |
|                | pGS5     | 2.8 | <i>Archaeoglobus profundus</i> strain AV18 | Cryptic plasmid, negative supercoiled                                  | (118)    |  |
|                | pArcpr01 | 2.8 | <i>Archaeoglobus profundus</i> DSM 5631    | Cryptic plasmid, similar to pGS5                                       | (119)    |  |

**Table S3 Extrachromosomal genetic elements: host, size and integrase**

| Viruses/plasmids | Host                                               | Size  | Integrase                                                       | Reference                            |
|------------------|----------------------------------------------------|-------|-----------------------------------------------------------------|--------------------------------------|
| SSV1             | <i>S. shibatae</i>                                 | 15.4  | SSV1-type integrase<br>Integrate at a tRNA <sup>Arg</sup> gene. | (120-126) (127)                      |
| SSV2             | <i>S. islandicus</i>                               | 14.7  | SSV1-type integrase<br>Integrated at a tRNA <sup>Gly</sup> gene | (3, 128)                             |
| SSV4             | <i>S. islandicus</i>                               | 15.1  | SSV1-type integrase<br>Integrated at a tRNA <sup>Glu</sup> gene | (4, 64)                              |
| SSV5             | <i>S. islandicus</i>                               | 15.3  | SSV1-type integrase                                             | (4)                                  |
| SSV7             | <i>S. islandicus</i>                               | 17.6  | SSV1-type integrase                                             | (4)                                  |
| SSV8             | <i>S. solfataricus</i> P2,<br>natural host unknown | 16.4  | SSV1-type integrase<br>Integrate at a non-tRNA gene             | (5)                                  |
| SSV9             | <i>S. solfataricus</i> P2,<br>natural host unknown | 17.3  | SSV1-type integrase                                             | (5)                                  |
| SSV6             | <i>Sulfolobus</i> species                          | 15.6  | SSV1-type integrase                                             | (4)                                  |
| SMF1             | Unknown <i>Sulfolobus</i><br>strains               | 14.8  | Putitive integrase                                              | (129)                                |
| ASV1             | <i>Acidianus</i> species                           | 24.1  | SSV1-type integrase                                             | (4)                                  |
| STSV1            | <i>S. tenchongensis</i>                            | 75.3  | Putative integrase                                              | (130)                                |
| STSV2            | <i>S. tenchongensis</i><br>HB25                    | 76.1  | Putative integrase                                              | (131)                                |
| ATV              | <i>Acidianus</i> species                           | 62.7  | Putative integrase                                              | (132)                                |
| APSV1            | <i>Aeropyrum pernix</i> K1                         | 38    | SSV1-type integrase                                             | (133)                                |
| APOV1            | <i>Aeropyrum pernix</i> K1                         | 13.8  | SSV1-type integrase                                             | (133)                                |
| phiCh1           | <i>Natrialba magadii</i>                           | 58.5  | Putative integrases 1 and 2                                     | (134, 135)                           |
| BJ1              | <i>Halorubrum</i> BJ1 B11                          | 42.2  | Putative integrase                                              | (46)                                 |
| psiM1            | <i>Methanobacterium</i>                            | 30.4  | Putative integrase                                              | (136)                                |
| psiM2            | <i>Methanothermobacter</i>                         | 26.1  | Tyrosine recombinase                                            | (44)                                 |
| psiM100          | <i>Methanothermobacter</i>                         | 28.8  | Putative integrase                                              | (45)                                 |
| HF1              |                                                    | 75.9  | Putative integrase                                              | (41, 50, 137)                        |
| HF2              |                                                    | 77.7  | Putative integrase                                              |                                      |
| TPV1             | <i>Thermococcus</i><br><i>prieurii</i>             | 21.5  | SSV1-type integrase                                             | (138)                                |
| HCTV-5           | <i>Halorcula</i>                                   | 102.1 | Putative integrase                                              | (139)                                |
| HRTV-5           | <i>Halorubrum</i>                                  | 76.1  | Putative integrase                                              | (139)                                |
| HRTV-7           | <i>Halorubrum</i>                                  | 69.0  | Putative integrase                                              | (139)                                |
| HRTV-8           | <i>Halorubrum</i>                                  | 74.5  | Putative integrase                                              | (139)                                |
| pSSVi            | <i>S. solfataricus</i>                             | 5.7   | SSV1-type integrase                                             | (67)                                 |
| pXZ1             | <i>S. islandicus</i> strain<br>ARN3/6              | 7.0   | SSV1-type integrase                                             | (64)                                 |
| pNOB8            | <i>Sulfolobus</i> sp.<br>NOB8H2 conjugative        |       | pNOB8-type integrase<br>Integrate at tRNA <sup>Glu</sup> genes  | (73, 74, 140)                        |
| pAH1             | <i>Acidianus hospitalis</i><br>strain W1           | 28.6  | pNOB8-type integrase                                            | (68)                                 |
| pARN3            | <i>S. islandicus</i>                               | 26.2  | pNOB8-type integrase                                            | (69)                                 |
| pARN4            | <i>S. islandicus</i>                               | 26.5  | pNOB8-type integrase                                            | (69)                                 |
| pHVE14           | <i>S. islandicus</i>                               | 35.4  | pNOB8-type integrase                                            | (69)                                 |
| pING1            | <i>S. islandicus</i>                               | 24.6  | pNOB8-type integrase                                            | (70)                                 |
| pKEF9            | <i>S. islandicus</i>                               | 28.9  | pNOB8-type integrase<br>Integrate at tRNA <sup>Glu</sup> genes  | (69) (Q. She<br>unpublished<br>data) |
| pSOG1            | <i>S. islandicus</i>                               | 29.0  | pNOB8-type integrase                                            | (71)                                 |
| pSOG2            | <i>S. islandicus</i>                               | 26.0  | pNOB8-type integrase                                            | (71)                                 |
| pLD8501          | <i>S. islandicus</i> L.D.8.5                       | 26.6  | Putative integrase                                              | (72)                                 |
| pYN01            | <i>S. islandicus</i><br>Y.N.15.51                  | 42.2  | Putative integrase                                              | (72)                                 |

|        |                                     |      |                      |            |
|--------|-------------------------------------|------|----------------------|------------|
| pHA1   | archaeal enrichment culture clone 1 | 33.8 | Integrase?           | (75)       |
| pT26-2 | <i>Thermococcus</i> sp. 26/2        | 21.6 | SSV1-type integrase  | (103)      |
| pC2A   | <i>Methanosarcina acetivorans</i>   | 5.5  | pNOB8-type integrase | (114, 115) |

## References

1. **Martin A, Yeats S, Janekovic D, Reiter WD, Aicher W, Zillig W.** 1984. Sav-1, a Temperate UV-Inducible DNA Virus-Like Particle from the Archaeobacterium *Sulfolobus*-*Acidocaldarius* Isolate B-12. *Embo Journal* **3**:2165-2168.
2. **Palm P, Schleper C, Grampp B, Yeats S, McWilliam P, Reiter WD, Zillig W.** 1991. Complete nucleotide sequence of the virus SSV1 of the archaeobacterium *Sulfolobus shibatae*. *Virology* **185**:242-250.
3. **Stedman KM, She Q, Phan H, Arnold HP, Holz I, Garrett RA, Zillig W.** 2003. Relationships between fuselloviruses infecting the extremely thermophilic archaeon *Sulfolobus*: SSV1 and SSV2. *Res Microbiol* **154**:295-302.
4. **Redder P, et al.** 2009. Four newly isolated fuselloviruses from extreme geothermal environments reveal unusual morphologies and a possible intervirial recombination mechanism. *Environ Microbiol* **11**:2849-2862.
5. **Wiedenheft B, Stedman K, Roberto F, Willits D, Gleske AK, Zoeller L, Snyder J, Douglas T, Young M.** 2004. Comparative genomic analysis of hyperthermophilic archaeal Fuselloviridae viruses. *J Virol* **78**:1954-1961.
6. **Haring M, Vestergaard G, Rachel R, Chen L, Garrett RA, Prangishvili D.** 2005. Virology: independent virus development outside a host. *Nature* **436**:1101-1102.
7. **Prangishvili D, Vestergaard G, Haring M, Aramayo R, Basta T, Rachel R, Garrett RA.** 2006. Structural and genomic properties of the hyperthermophilic archaeal virus ATV with an extracellular stage of the reproductive cycle. *Journal of Molecular Biology* **359**:1203-1216.
8. **Bath C, Cukalac T, Porter K, Dyll-Smith ML.** 2006. His1 and His2 are distantly related, spindle-shaped haloviruses belonging to the novel virus group, Salterprovirus. *Virology* **350**:228-239.
9. **Bath C, Dyll-Smith ML.** 1998. His1, an archaeal virus of the Fuselloviridae family that infects *Haloarcula hispanica*. *Journal of Virology* **72**:9392-9395.
10. **Xiang XY, Chen LM, Huang XX, Luo YM, She QX, Huang L.** 2005. *Sulfolobus tengchongensis* spindle-shaped virus STSV1: Virus-host interactions and genomic features. *Journal of Virology* **79**:8677-8686.
11. **Erdmann S, et al.** 2014. A novel single-tailed fusiform *Sulfolobus* virus STSV2 infecting model *Sulfolobus* species. *Extremophiles* **18**:51-60.
12. **Geslin C, Gaillard M, Flament D, Rouault K, Le Romancer M, Prieur D, Erauso G.** 2007. Analysis of the first genome of a hyperthermophilic marine virus-like particle, PAV1, isolated from *Pyrococcus abyssi*. *Journal of Bacteriology* **189**:4510-4519.
13. **Geslin C, Le Romancer M, Erauso G, Gaillard M, Perrot G, Prieur D.** 2003. PAV1, the first virus-like particle isolated from a hyperthermophilic euryarchaeote, "*Pyrococcus abyssi*". *J Bacteriol* **185**:3888-3894.
14. **Gorlas A, Koonin EV, Bienvenu N, Prieur D, Geslin C.** 2012. TPV1, the first virus isolated from the hyperthermophilic genus *Thermococcus*. *Environmental Microbiology* **14**:503-516.
15. **Mochizuki T, Sako Y, Prangishvili D.** 2011. Provirus Induction in Hyperthermophilic Archaea: Characterization of *Aeropyrum pernix* Spindle-Shaped Virus 1 and *Aeropyrum pernix* Ovoid Virus 1. *Journal of Bacteriology* **193**:5412-5419.
16. **Haring M, Rachel R, Peng X, Garrett RA, Prangishvili D.** 2005. Viral diversity in hot springs of Pozzuoli, Italy, and characterization of a unique archaeal virus, acidianus bottle-shaped virus, from a new family, the Ampullaviridae. *Journal of Virology* **79**:9904-9911.

17. **Mochizuki T, Yoshida T, Tanaka R, Forterre P, Sako Y, Prangishvili D.** 2010. Diversity of viruses of the hyperthermophilic archaeal genus *Aeropyrum*, and isolation of the *Aeropyrum pernix* bacilliform virus 1, APBV1, the first representative of the family Clavaviridae. *Virology* **402**:347-354.
18. **Mochizuki T, Krupovic M, Pehau-Arnaudet G, Sako Y, Forterre P, Prangishvili D.** 2012. Archaeal virus with exceptional virion architecture and the largest single-stranded DNA genome. *Proceedings of the National Academy of Sciences of the United States of America* **109**:13386-13391.
19. **Arnold HP, Ziese U, Zillig W.** 2000. SNDV, a novel virus of the extremely thermophilic and acidophilic archaeon *Sulfolobus*. *Virology* **272**:409-416.
20. **Janekovic D, Wunderl S, Holz I, Zillig W, Gierl A, Neumann H.** 1983. TTV1, TTV2 AND TTV3, A FAMILY OF VIRUSES OF THE EXTREMELY THERMOPHILIC, ANAEROBIC, SULFUR REDUCING ARCHAEABACTERIUM THERMOPROTEUS-TENAX. *Molecular & General Genetics* **192**:39-45.
21. **Arnold HP, et al.** 2000. A novel lipothrixvirus, SIFV, of the extremely thermophilic crenarchaeon *Sulfolobus*. *Virology* **267**:252-266.
22. **Vestergaard G, et al.** 2008. Structure of the acidianus filamentous virus 3 and comparative genomics of related archaeal lipothrixviruses. *J Virol* **82**:371-381.
23. **Bize A, Peng X, Prokofeva M, MacLellan K, Lucas S, Forterre P, Garrett RA, Bonch-Osmolovskaya EA, Prangishvili D.** 2008. Viruses in acidic geothermal environments of the Kamchatka Peninsula. *Research in Microbiology* **159**:358-366.
24. **Bettstetter M, Peng X, Garrett RA, Prangishvili D.** 2003. AFV1, a novel virus infecting hyperthermophilic archaea of the genus acidianus. *Virology* **315**:68-79.
25. **Haring M, Vestergaard G, Brugger K, Rachel R, Garrett RA, Prangishvili D.** 2005. Structure and genome organization of AFV2, a novel archaeal lipothrixvirus with unusual terminal and core structures. *J Bacteriol* **187**:3855-3858.
26. **Prangishvili D, Arnold HP, Gotz D, Ziese U, Holz I, Kristjansson JK, Zillig W.** 1999. A novel virus family, the Rudiviridae: Structure, virus-host interactions and genome variability of the sulfolobus viruses SIRV1 and SIRV2. *Genetics* **152**:1387-1396.
27. **Peng X, Blum H, She QX, Mallok S, Brugger K, Garrett RA, Zillig W, Prangishvili D.** 2001. Sequences and replication of genomes of the archaeal rudiviruses SIRV1 and SIRV2: Relationships to the archaeal lipothrixvirus SIFV and some eukaryal viruses. *Virology* **291**:226-234.
28. **Vestergaard G, Haring M, Peng X, Rachel R, Garrett RA, Prangishvili D.** 2005. A novel rudivirus, ARV1, of the hyperthermophilic archaeal genus Acidianus. *Virology* **336**:83-92.
29. **Vestergaard G, et al.** 2008. Stygiolobus rod-shaped virus and the interplay of crenarchaeal rudiviruses with the CRISPR antiviral system. *Journal of Bacteriology* **190**:6837-6845.
30. **Haring M, Peng X, Brugger K, Rachel R, Stetter KO, Garrett RA, Prangishvili D.** 2004. Morphology and genome organization of the virus PSV of the hyperthermophilic archaeal genera *Pyrobaculum* and *Thermoproteus*: a novel virus family, the *Globuloviridae*. *Virology* **323**:233-242.
31. **Ahn DG, Kim SI, Rhee JK, Kim KP, Pan JG, Oh JW.** 2006. TTSV1, a new virus-like particle isolated from the hyperthermophilic crenarchaeote *Thermoproteus tenax*. *Virology* **351**:280-290.
32. **Rice G, Tang L, Stedman K, Roberto F, Spuhler J, Gillitzer E, Johnson JE, Douglas T, Young M.** 2004. The structure of a thermophilic archaeal virus shows a double-stranded DNA viral capsid type that spans all domains of life. *Proceedings of the National Academy of Sciences of the United States of America* **101**:7716-7720.
33. **Porter K, Kukkaro P, Bamford JK, Bath C, Kivela HM, Dyall-Smith ML, Bamford DH.** 2005. SH1: A novel, spherical halovirus isolated from an Australian hypersaline lake. *Virology* **335**:22-33.
34. **Jaakkola ST, Penttinen RK, Vilen ST, Jalasvuori M, Ronnholm G, Bamford JKH, Bamford DH, Oksanen HM.** 2012. Closely Related Archaeal Haloarcula hispanica Icosahedral Viruses HHIV-2 and SH1 Have Nonhomologous Genes Encoding Host Recognition Functions. *Journal of Virology* **86**:4734-4742.

35. **Porter K, Tang SL, Chen CP, Chiang PW, Hong MJ, Dyall-Smith M.** 2013. PH1: An Archaeovirus of *Haloarcula hispanica* Related to SH1 and HHIV-2. *Archaea-an International Microbiological Journal*.
36. **Roine E, Kukkaro P, Paulin L, Laurinavicius S, Domanska A, Somerharju P, Bamford DH.** 2010. New, Closely Related Haloarchaeal Viral Elements with Different Nucleic Acid Types. *Journal of Virology* **84**:3682-3689.
37. **Ming L, Rui W, Dahe Z, Hua X.** 2013. Adaptation of the *Haloarcula hispanica* CRISPR-Cas system to a purified virus strictly requires a priming process. *Nucleic Acids Research*.
38. **Pietila MK, Roine E, Paulin L, Kalkkinen N, Bamford DH.** 2009. An ssDNA virus infecting archaea: a new lineage of viruses with a membrane envelope. *Molecular Microbiology* **72**:307-319.
39. **Atanasova NS, Roine E, Oren A, Bamford DH, Oksanen HM.** 2012. Global network of specific virus-host interactions in hypersaline environments. *Environmental Microbiology* **14**:426-440.
40. **Sencilo A, Paulin L, Kellner S, Helm M, Roine E.** 2012. Related haloarchaeal pleomorphic viruses contain different genome types. *Nucleic Acids Research* **40**:5523-5534.
41. **Nuttall SD, Dyallsmith ML.** 1993. Hf1 and Hf2 - Novel Bacteriophages of Halophilic Archaea. *Virology* **197**:678-684.
42. **Witte A, Baranyi U, Klein R, Sulzner M, Luo C, Wanner G, Kruger DH, Lubitz W.** 1997. Characterization of *Natronobacterium magadii* phage Phi Ch1, a unique archaeal phage containing DNA and RNA. *Molecular Microbiology* **23**:603-616.
43. **Meile L, Jenal U, Studer D, Jordan M, Leisinger T.** 1989. CHARACTERIZATION OF PSI-M1, A VIRULENT PHAGE OF METHANOBACTERIUM-THERMOAUTOTROPHICUM MARBURG. *Archives of Microbiology* **152**:105-110.
44. **Pfister P, Wasserfallen A, Stettler R, Leisinger T.** 1998. Molecular analysis of *Methanobacterium* phage psiM2. *Mol Microbiol* **30**:233-244.
45. **Luo YN, Pfister P, Leisinger T, Wasserfallen A.** 2001. The genome of archaeal prophage Psi M100 encodes the lytic enzyme responsible for autolysis of *Methanothermobacter wolfeii*. *Journal of Bacteriology* **183**:5788-5792.
46. **Pagaling E, Haigh RD, Grant WD, Cowan DA, Jones BE, Ma Y, Ventosa A, Heaphy S.** 2007. Sequence analysis of an Archaeal virus isolated from a hypersaline lake in Inner Mongolia, China. *BMC Genomics* **8**.
47. **Kukkaro P, Bamford DH.** 2009. Virus-host interactions in environments with a wide range of ionic strengths. *Environmental Microbiology Reports* **1**:71-77.
48. **Mei YJ, Chen D, Sun DC, Yang Y, Shen P, Chen XD.** 2007. Induction and preliminary characterization of a novel halophage SNJ1 from lysogenic *Natrinema* sp F5. *Canadian Journal of Microbiology* **53**:1106-1110.
49. **Zhang ZQ, et al.** 2012. Temperate membrane-containing halophilic archaeal virus SNJ1 has a circular dsDNA genome identical to that of plasmid pHH205. *Virology* **434**:233-241.
50. **Nuttall SD, Dyall-Smith ML.** 1995. Halophage HF2: genome organization and replication strategy. *J Virol* **69**:2322-2327.
51. **Tang SL, Nuttall S, Ngui K, Fisher C, Lopez P, Dyall-Smith M.** 2002. HF2: a double-stranded DNA tailed haloarchaeal virus with a mosaic genome. *Molecular Microbiology* **44**:283-296.
52. **Schnabel H, Schramm E, Schnabel R, Zillig W.** 1982. STRUCTURAL VARIABILITY IN THE GENOME OF PHAGE PHI-H OF HALOBACTERIUM-HALOBIIUM. *Molecular & General Genetics* **188**:370-377.
53. **Schnabel H, Zillig W, Pfaffle M, Schnabel R, Michel H, Delius H.** 1982. HALOBACTERIUM-HALOBIIUM PHAGE PHI-H. *Embo Journal* **1**:87-92.
54. **Kletz A, Lieke A, Urich T, Charlebois RL, Sensen CW.** 1999. Molecular analysis of pDL10 from *Acidianus ambivalens* reveals a family of related plasmids from extremely thermophilic and acidophilic archaea. *Genetics* **152**:1307-1314.
55. **Keeling PJ, Klenk HP, Singh RK, Feeley O, Schleper C, Zillig W, Doolittle WF, Sensen CW.** 1996. Complete nucleotide sequence of the *Sulfolobus islandicus* multicopy plasmid pRN1. *Plasmid* **35**:141-144.

56. **Keeling PJ, Klenk HP, Singh RK, Schenk ME, Sensen CW, Zillig W, Doolittle WF.** 1998. *Sulfolobus islandicus* plasmids pRN1 and pRN2 share distant but common evolutionary ancestry. *Extremophiles* **2**:391-393.
57. **Berkner S, Grogan D, Albers SV, Lipps G.** 2007. Small multicopy, non-integrative shuttle vectors based on the plasmid pRN1 for *Sulfolobus acidocaldarius* and *Sulfolobus solfataricus*, model organisms of the (cren-)archaea. *Nucleic Acids Res* **35**:e88.
58. **Deng L, Zhu H, Chen Z, Liang YX, She Q.** 2009. Unmarked gene deletion and host-vector system for the hyperthermophilic crenarchaeon *Sulfolobus islandicus*. *Extremophiles* **13**:735-746.
59. **Peng N, Xia Q, Chen Z, Liang YX, She Q.** 2009. An upstream activation element exerting differential transcriptional activation on an archaeal promoter. *Mol Microbiol* **74**:928-939.
60. **Gudbergsdottir S, Deng L, Chen Z, Jensen JV, Jensen LR, She Q, Garrett RA.** 2011. Dynamic properties of the *Sulfolobus* CRISPR/Cas and CRISPR/Cmr systems when challenged with vector-borne viral and plasmid genes and protospacers. *Mol Microbiol* **79**:35-49.
61. **Peng N, Deng L, Mei Y, Jiang D, Hu Y, Awayez M, Liang Y, She Q.** 2012. A synthetic arabinose-inducible promoter confers high levels of recombinant protein expression in hyperthermophilic archaeon *Sulfolobus islandicus*. *Appl Environ Microbiol* **78**:5630-5637.
62. **Peng X, Holz I, Zillig W, Garrett RA, She Q.** 2000. Evolution of the family of pRN plasmids and their integrase-mediated insertion into the chromosome of the crenarchaeon *Sulfolobus solfataricus*. *J Mol Biol* **303**:449-454.
63. **Prato S, Cannio R, Klenk HP, Contursi P, Rossi M, Bartolucci S.** 2006. pIT3, a cryptic plasmid isolated from the hyperthermophilic crenarchaeon *Sulfolobus solfataricus* IT3. *Plasmid* **56**:35-45.
64. **Peng X.** 2008. Evidence for the horizontal transfer of an integrase gene from a fusellovirus to a pRN-like plasmid within a single strain of *Sulfolobus* and the implications for plasmid survival. *Microbiology* **154**:383-391.
65. **Greve B, Jensen S, Phan H, Brugger K, Zillig W, She Q, Garrett RA.** 2005. Novel RepA-MCM proteins encoded in plasmids pTAU4, pORA1 and pTIK4 from *Sulfolobus neozealandicus*. *Archaea* **1**:319-325.
66. **Arnold HP, She Q, Phan H, Stedman K, Prangishvili D, Holz I, Kristjansson JK, Garrett R, Zillig W.** 1999. The genetic element pSSVx of the extremely thermophilic crenarchaeon *Sulfolobus* is a hybrid between a plasmid and a virus. *Mol Microbiol* **34**:217-226.
67. **Wang Y, Duan Z, Zhu H, Guo X, Wang Z, Zhou J, She Q, Huang L.** 2007. A novel *Sulfolobus* non-conjugative extrachromosomal genetic element capable of integration into the host genome and spreading in the presence of a fusellovirus. *Virology* **363**:124-133.
68. **Basta T, Smyth J, Forterre P, Prangishvili D, Peng X.** 2009. Novel archaeal plasmid pAH1 and its interactions with the lipothrixvirus AFV1. *Mol Microbiol* **71**:23-34.
69. **Greve B, Jensen S, Brugger K, Zillig W, Garrett RA.** 2004. Genomic comparison of archaeal conjugative plasmids from *Sulfolobus*. *Archaea* **1**:231-239.
70. **Stedman KM, She Q, Phan H, Holz I, Singh H, Prangishvili D, Garrett R, Zillig W.** 2000. pING family of conjugative plasmids from the extremely thermophilic archaeon *Sulfolobus islandicus*: insights into recombination and conjugation in Crenarchaeota. *J Bacteriol* **182**:7014-7020.
71. **Erauso G, Stedman KM, van de Werken HJ, Zillig W, van der Oost J.** 2006. Two novel conjugative plasmids from a single strain of *Sulfolobus*. *Microbiology* **152**:1951-1968.
72. **Reno ML, Held NL, Fields CJ, Burke PV, Whitaker RJ.** 2009. Biogeography of the *Sulfolobus islandicus* pan-genome. *Proc Natl Acad Sci U S A* **106**:8605-8610.
73. **Schleper C, Holz I, Janekovic D, Murphy J, Zillig W.** 1995. A multicopy plasmid of the extremely thermophilic archaeon *Sulfolobus* effects its transfer to recipients by mating. *J Bacteriol* **177**:4417-4426.
74. **She Q, Phan H, Garrett RA, Albers SV, Stedman KM, Zillig W.** 1998. Genetic profile of pNOB8 from *Sulfolobus*: the first conjugative plasmid from an archaeon. *Extremophiles* **2**:417-425.

75. **Garrett RA, Prangishvili D, Shah SA, Reuter M, Stetter KO, Peng X.** 2010. Metagenomic analyses of novel viruses and plasmids from a cultured environmental sample of hyperthermophilic neutrophiles. *Environ Microbiol* **12**:2918-2930.
76. **Zhou LG, Zhou MX, Sun CM, Xiang H, Tan HR.** 2007. Genetic analysis of a novel plasmid pZMX101 from *Halorubrum saccharovorum*: determination of the minimal replicon and comparison with the related haloarchaeal plasmid pSCM201. *FEMS Microbiol Lett* **270**:104-108.
77. **Sun C, Zhou M, Li Y, Xiang H.** 2006. Molecular characterization of the minimal replicon and the unidirectional theta replication of pSCM201 in extremely halophilic archaea. *J Bacteriol* **188**:8136-8144.
78. **Sun C, Li Y, Mei S, Lu Q, Zhou L, Xiang H.** 2005. A single gene directs both production and immunity of halocin C8 in a haloarchaeal strain AS7092. *Mol Microbiol* **57**:537-549.
79. **Zhou L, Zhou MX, Sun CM, Han J, Lu QH, Zhou J, Xiang H.** 2008. Precise determination, cross-recognition, and functional analysis of the double-strand origins of the rolling-circle replication plasmids in haloarchaea. *J Bacteriol* **190**:5710-5719.
80. **Zhou MX, Xiang H, Sun CM, Li Y, Liu JF, Tan HR.** 2004. Complete sequence and molecular characterization of pNB101, a rolling-circle replicating plasmid from the haloalkaliphilic archaeon *Natronobacterium* sp strain AS7091. *Extremophiles* **8**:91-98.
81. **Kagramanova VK, Derckacheva NI, Mankin AS.** 1988. The complete nucleotide sequence of the archaeobacterial plasmid pHSB from *Halobacterium*, strain SB3. *Nucleic Acids Res* **16**:4158.
82. **Hall MJ, Hackett NR.** 1989. DNA sequence of a small plasmid from *Halobacterium* strain GN101. *Nucleic Acids Res* **17**:10501.
83. **Hackett NR, Krebs MP, DasSarma S, Goebel W, RajBhandary UL, Khorana HG.** 1990. Nucleotide sequence of a high copy number plasmid from *Halobacterium* strain GRB. *Nucleic Acids Res* **18**:3408.
84. **Ilyina TV, Koonin EV.** 1992. Conserved sequence motifs in the initiator proteins for rolling circle DNA replication encoded by diverse replicons from eubacteria, eucaryotes and archaeobacteria. *Nucleic Acids Res* **20**:3279-3285.
85. **Sioud M, Baldacci G, Forterre P, de Recondo AM.** 1988. Novobiocin induces accumulation of a single strand of plasmid pGRB-1 in the archaeobacterium *Halobacterium* GRB. *Nucleic Acids Res* **16**:7833-7842.
86. **Hackett NR, DasSarma S.** 1989. Characterization of the small endogenous plasmid of *Halobacterium* strain SB3 and its use in transformation of *Halobacterium halobium*. *Can J Microbiol* **35**:86-91.
87. **Holmes M, Pfeifer F, Dyall-Smith M.** 1994. Improved shuttle vectors for *Haloferax volcanii* including a dual-resistance plasmid. *Gene* **146**:117-121.
88. **Holmes ML, Dyall-Smith ML.** 1990. A plasmid vector with a selectable marker for halophilic archaeobacteria. *J Bacteriol* **172**:756-761.
89. **Holmes ML, Pfeifer F, Dyall-Smith ML.** 1995. Analysis of the halobacterial plasmid pHK2 minimal replicon. *Gene* **153**:117-121.
90. **Charlebois RL, Lam WL, Cline SW, Doolittle WF.** 1987. Characterization of pHV2 from *Halobacterium volcanii* and its use in demonstrating transformation of an archaeobacterium. *Proc Natl Acad Sci U S A* **84**:8530-8534.
91. **Allers T, Barak S, Liddell S, Wardell K, Mevarech M.** 2010. Improved strains and plasmid vectors for conditional overexpression of His-tagged proteins in *Haloferax volcanii*. *Appl Environ Microbiol* **76**:1759-1769.
92. **Hartman AL, et al.** 2010. The complete genome sequence of *Haloferax volcanii* DS2, a model archaeon. *PLoS One* **5**:e9605.
93. **Dyall-Smith ML, Pfeiffer F, Klee K, Palm P, Gross K, Schuster SC, Rampp M, Oesterhelt D.** 2011. *Haloquadratum walsbyi*: limited diversity in a global pond. *PLoS One* **6**:e20968.
94. **Roh SW, Nam YD, Nam SH, Choi SH, Park HS, Bae JW.** 2010. Complete genome sequence of *Halalkalicoccus jeotgali* B3(T), an extremely halophilic archaeon. *J Bacteriol* **192**:4528-4529.

95. **Erauso G, Marsin S, Benbouzid-Rollet N, Baucher MF, Barbeyron T, Zivanovic Y, Prieur D, Forterre P.** 1996. Sequence of plasmid pGT5 from the archaeon *Pyrococcus abyssi*: evidence for rolling-circle replication in a hyperthermophile. *J Bacteriol* **178**:3232-3237.
96. **Aravalli RN, Garrett RA.** 1997. Shuttle vectors for hyperthermophilic archaea. *Extremophiles* **1**:183-191.
97. **Lucas S, Toffin L, Zivanovic Y, Charlier D, Moussard H, Forterre P, Prieur D, Erauso G.** 2002. Construction of a shuttle vector for, and spheroplast transformation of, the hyperthermophilic archaeon *Pyrococcus abyssi*. *Appl Environ Microbiol* **68**:5528-5536.
98. **Soler N, Justome A, Quevillon-Cheruel S, Lorieux F, Le Cam E, Marguet E, Forterre P.** 2007. The rolling-circle plasmid pTN1 from the hyperthermophilic archaeon *Thermococcus nautilus*. *Mol Microbiol* **66**:357-370.
99. **Santangelo TJ, Cubonova L, Reeve JN.** 2008. Shuttle vector expression in *Thermococcus kodakaraensis*: contributions of cis elements to protein synthesis in a hyperthermophilic archaeon. *Appl Environ Microbiol* **74**:3099-3104.
100. **Gorlas A, Krupovic M, Forterre P, Geslin C.** 2013. Living Side by Side with a Virus: Characterization of Two Novel Plasmids from *Thermococcus prieurii*, a Host for the Spindle-Shaped Virus TPV1. *Appl Environ Microbiol* **79**:3822-3828.
101. **Gonnet M, Erauso G, Prieur D, Le Romancer M.** 2011. pAMT11, a novel plasmid isolated from a *Thermococcus* sp. strain closely related to the virus-like integrated element TKV1 of the *Thermococcus kodakaraensis* genome. *Res Microbiol* **162**:132-143.
102. **Ward DE, Revet IM, Nandakumar R, Tuttle JH, de Vos WM, van der Oost J, DiRuggiero J.** 2002. Characterization of plasmid pRT1 from *Pyrococcus* sp. strain JT1. *J Bacteriol* **184**:2561-2566.
103. **Soler N, Marguet E, Cortez D, Desnoues N, Keller J, van Tilbeurgh H, Sezonov G, Forterre P.** 2010. Two novel families of plasmids from hyperthermophilic archaea encoding new families of replication proteins. *Nucleic Acids Res* **38**:5088-5104.
104. **Krupovic M, Gonnet M, Ben Hania W, Forterre P, Erauso G.** 2013. Insights into Dynamics of Mobile Genetic Elements in Hyperthermophilic Environments from Five New *Thermococcus* Plasmids. *Plos One* **8**.
105. **Tumbula DL, Bowen TL, Whitman WB.** 1997. Characterization of pURB500 from the archaeon *Methanococcus maripaludis* and construction of a shuttle vector. *J Bacteriol* **179**:2976-2986.
106. **Bult CJ, et al.** 1996. Complete genome sequence of the methanogenic archaeon, *Methanococcus jannaschii*. *Science* **273**:1058-1073.
107. **Liesegang H, Kaster AK, Wiezer A, Goenrich M, Wollherr A, Seedorf H, Gottschalk G, Thauer RK.** 2010. Complete genome sequence of *Methanothermobacter marburgensis*, a methanoarchaeon model organism. *J Bacteriol* **192**:5850-5851.
108. **Thomm M, Altenbuchner J, Stetter KO.** 1983. Evidence for a plasmid in a methanogenic bacterium. *J Bacteriol* **153**:1060-1062.
109. **Bokranz M, Klein A, Meile L.** 1990. Complete nucleotide sequence of plasmid pME2001 of *Methanobacterium thermoautotrophicum* (Marburg). *Nucleic Acids Res* **18**:363.
110. **Meile L, Madon J, Leisinger T.** 1988. Identification of a transcript and its promoter region on the archaeobacterial plasmid pME2001. *J Bacteriol* **170**:478-481.
111. **Luo Y, Leisinger T, Wasserfallen A.** 2001. Comparative sequence analysis of plasmids pME2001 and pME2200 of *Methanothermobacter marburgensis* strains Marburg and ZH3. *Plasmid* **45**:18-30.
112. **Nolling J, van Eeden FJ, Eggen RI, de Vos WM.** 1992. Modular organization of related Archaeal plasmids encoding different restriction-modification systems in *Methanobacterium thermoformicicum*. *Nucleic Acids Res* **20**:6501-6507.
113. **Nolling J, de Vos WM.** 1992. Characterization of the archaeal, plasmid-encoded type II restriction-modification system MthTI from *Methanobacterium thermoformicicum* THF: homology to the bacterial NgoPII system from *Neisseria gonorrhoeae*. *J Bacteriol* **174**:5719-5726.



114. **Metcalf WW, Zhang JK, Apolinario E, Sowers KR, Wolfe RS.** 1997. A genetic system for Archaea of the genus *Methanosarcina*: liposome-mediated transformation and construction of shuttle vectors. *Proc Natl Acad Sci U S A* **94**:2626-2631.
115. **Sowers KR, Gunsalus RP.** 1988. Plasmid DNA from the acetotrophic methanogen *Methanosarcina acetivorans*. *J Bacteriol* **170**:4979-4982.
116. **Maeder DL, et al.** 2006. The *Methanosarcina barkeri* genome: comparative analysis with *Methanosarcina acetivorans* and *Methanosarcina mazei* reveals extensive rearrangement within methanosarcinal genomes. *J Bacteriol* **188**:7922-7931.
117. **Angelov A, Voss J, Liebl W.** 2011. Characterization of plasmid pPO1 from the hyperacidophile *Picrophilus oshimae*. *Archaea* **2011**:723604.
118. **Lopez-Garcia P, Forterre P, van der Oost J, Erauso G.** 2000. Plasmid pGS5 from the hyperthermophilic archaeon *Archaeoglobus profundus* is negatively supercoiled. *J Bacteriol* **182**:4998-5000.
119. **von Jan M, et al.** 2010. Complete genome sequence of *Archaeoglobus profundus* type strain (AV18). *Stand Genomic Sci* **2**:327-346.
120. **Reiter WD, Palm P, Yeats S.** 1989. Transfer RNA genes frequently serve as integration sites for prokaryotic genetic elements. *Nucleic Acids Res* **17**:1907-1914.
121. **Schleper C, Kubo K, Zillig W.** 1992. The particle SSV1 from the extremely thermophilic archaeon *Sulfolobus* is a virus: demonstration of infectivity and of transfection with viral DNA. *Proc Natl Acad Sci U S A* **89**:7645-7649.
122. **Muskhelishvili G, Palm P, Zillig W.** 1993. SSV1-encoded site-specific recombination system in *Sulfolobus shibatae*. *Mol Gen Genet* **237**:334-342.
123. **Serre MC, Letzelter C, Garel JR, Duguet M.** 2002. Cleavage properties of an archaeal site-specific recombinase, the SSV1 integrase. *J Biol Chem* **277**:16758-16767.
124. **Letzelter C, Duguet M, Serre MC.** 2004. Mutational analysis of the archaeal tyrosine recombinase SSV1 integrase suggests a mechanism of DNA cleavage in trans. *J Biol Chem* **279**:28936-28944.
125. **Eilers BJ, Young MJ, Lawrence CM.** 2012. The structure of an archaeal viral integrase reveals an evolutionarily conserved catalytic core yet supports a mechanism of DNA cleavage in trans. *J Virol* **86**:8309-8313.
126. **Zhan Z, Ouyang S, Liang W, Zhang Z, Liu ZJ, Huang L.** 2012. Structural and functional characterization of the C-terminal catalytic domain of SSV1 integrase. *Acta Crystallogr D Biol Crystallogr* **68**:659-670.
127. **Palm P, Schleper C, Grampp B, Yeats S, McWilliam P, Reiter WD, Zillig W.** 1991. Complete Nucleotide-Sequence of the Virus SSV1 of the Archaeobacterium *Sulfolobus shibatae*. *Virology* **185**:242-250.
128. **Contursi P, Jensen S, Aucelli T, Rossi M, Bartolucci S, She Q.** 2006. Characterization of the *Sulfolobus* host-SSV2 virus interaction. *Extremophiles* **10**:615-627.
129. **Servin-Garciduenas LE, Peng X, Garrett RA, Martinez-Romero E.** 2013. Genome sequence of a novel archaeal fusellovirus assembled from the metagenome of a mexican hot spring. *Genome Announc* **1**:e0016413.
130. **Xiang X, Chen L, Huang X, Luo Y, She Q, Huang L.** 2005. *Sulfolobus tengchongensis* spindle-shaped virus STSV1: virus-host interactions and genomic features. *J. Virol.* **79**:8677-8686.
131. **Erdmann S, et al.** 2014. A novel single-tailed fusiform *Sulfolobus* virus STSV2 infecting model *Sulfolobus* species. *Extremophiles* **18**:51-60.
132. **Prangishvili D, Vestergaard G, Haring M, Aramayo R, Basta T, Rachel R, Garrett RA.** 2006. Structural and genomic properties of the hyperthermophilic archaeal virus ATV with an extracellular stage of the reproductive cycle. *J Mol Biol* **359**:1203-1216.
133. **Mochizuki T, Sako Y, Prangishvili D.** 2011. Provirus Induction in Hyperthermophilic Archaea: Characterization of *Aeropyrum pernix* Spindle-Shaped Virus 1 and *Aeropyrum pernix* Ovoid Virus 1. *J Bacteriol* **193**:5412-5419.
134. **Klein R, Baranyi U, Rössler N, Greineder B, Scholz H, Witte A.** 2002. *Natrialba magadii* virus phiCh1: first complete nucleotide sequence and functional organization of a virus infecting a haloalkaliphilic archaeon. *Mol Microbiol* **45**:851-863.

135. **Witte A, Baranyi U, Klein R, Sulzner M, Luo C, Wanner G, Kruger DH, Lubitz W.** 1997. Characterization of *Natronobacterium magadii* phage Phi Ch1, a unique archaeal phage containing DNA and RNA. *Mol Microbiol* **23**:603-616.
136. **Meile L, Jenal U, Studer D, Jordan M, Leisinger T.** 1989. Characterization of Psi-M1, a Virulent Phage of *Methanobacterium-Thermoautotrophicum* Marburg. *Arch Microbiol* **152**:105-110.
137. **Tang SL, Nuttall S, Ngui K, Fisher C, Lopez P, Dyall-Smith M.** 2002. HF2: a double-stranded DNA tailed haloarchaeal virus with a mosaic genome. *Mol Microbiol* **44**:283-296.
138. **Gorlas A, Koonin EV, Bienvenu N, Prieur D, Geslin C.** 2012. TPV1, the first virus isolated from the hyperthermophilic genus *Thermococcus*. *Environ Microbiol* **14**:503-516.
139. **Atanasova NS, Roine E, Oren A, Bamford DH, Oksanen HM.** 2012. Global network of specific virus-host interactions in hypersaline environments. *Environ Microbiol* **14**:426-440.
140. **She Q, Shen B, Chen L.** 2004. Archaeal integrases and mechanisms of gene capture. *Biochem Soc Trans* **32**:222-226.
